1 **Pilot scale study on UV-C inactivation of bacterial endospores and virus**  
2 **particles in whole milk: evaluation of system efficiency and product quality**

3 Pranav Vashisht, Brahmaiah Pendyala\*, Ankit Patras\*, Vybhav Vipul Sudhir Gopisetty,  
4 Ramasamy Ravi

5 Food Biosciences and Technology Program, Department of Agricultural and Environmental  
6 Sciences, Tennessee State University, Nashville, 37209, TN, USA  
7  
8  
9

10  
11 \*Corresponding authors:

12 Ankit Patras, Ph.D.

13 Associate Professor, Food Science & Engineering

14 Email: [apatras@tnstate.edu](mailto:apatras@tnstate.edu)

15 Tel: 1-615-963-6007; 615-707-8436

16 Brahmaiah Pendyala, Ph.D.

17 Senior Research Associate

18 E-mail: [bpendyal@tnstate.edu](mailto:bpendyal@tnstate.edu)

19 Tel: 1-615-963-6007; 419-699-6348  
20  
21  
22  
23  
24  
25  
26  
27  
28  
29  
30  
31  
32

33 **Abstract**

34 UV-C processing of whole milk (WM) using a designed pilot scale Dean flow system was  
35 conducted at flow rates (11.88, 23.77, and 47.55 gph), Reynolds number ranges from 2890-11562  
36 and the Dean number (at curved region) calculated as (648-2595) to inactivate bacterial endospores  
37 and virus particles. Biodosimetry studies were conducted to quantify the reduction equivalent  
38 fluence at selected experimental conditions. Results revealed that the fluence distribution  
39 improved as flow rate increases, attributed to increase in Dean effects and turbulence intensity.  
40 Microbial inactivation studies conducted at 47.55 gph showed  $0.91 \pm 0.15$  and  $2.14 \pm 0.19$  log  
41 reduction/ pass for *B. cereus* endospores and T1UV phage. Linear inactivation trend was observed  
42 against number of passes which clearly demonstrates equivalent fluence delivery during each pass.  
43 Lipid peroxidation value and volatiles profile did not change significantly at UV fluence of 60  
44 mJ/cm<sup>2</sup>. Lower E<sub>EO</sub> value signifies the higher electrical efficiency of the system.

45 **Keywords:** Pilot scale UV system; whole milk; bacterial endospores; virus particles; lipid  
46 peroxidation; volatiles profile

47

48

49

50

51

52

53

54

55

## 56 **1. Introduction**

57 Milk and its products are the potential source of various nutrients such as lipids, proteins,  
58 carbohydrates, vitamins, minerals, and enzymes; these components present in milk allows the  
59 growth of numerous pathogenic microorganisms (Oliver et al., 2005; Shanmugam et al., 2012;  
60 Bogahawaththa et al., 2018; Munir et al., 2019). According to Delorme et al. (2020), dairy  
61 processing needs strict quality control as contamination issues can originate at any stage of the  
62 food chain. The presence of aerobic spore-forming bacteria of the *Bacillus* genus in milk is  
63 consider as the major cause of deterioration of raw and pasteurized milk (Crielly et al., 1994;  
64 Cosentino et al., 1997). *B. cereus* is a major concern for the dairy industry because of its  
65 psychrotolerant nature, which limits the shelf life of the pasteurized milk and milk products stored  
66 at 6-7°C and its ability to produce toxins which makes it a potential cause for foodborne illnesses  
67 where the production of emetic and enterotoxin results in vomiting and diarrhea, respectively  
68 (Griffiths, 1992; Bilbao-Sáinz et al., 2009). According to CDC, more than 63000 cases of *B.*  
69 *cereus* illness are reported annually in the United States and all of them are foodborne (Scallan et  
70 al., 2011).

71 Pasteurization and sterilization are the most common techniques used by industries to ensure  
72 the safety of milk (Bermúdez-Aguirre et al., 2009; Choudhary and Bandla, 2012; Patras et al.,  
73 2020). The Code of Federal Regulations (3), Title 21, Section 131.3b, defines pasteurized dairy  
74 products as using properly operated equipment to heat every particle of the product to a specified  
75 temperature and held at or above that temperature for a specified time. Though these techniques  
76 are efficient and can inactivate numerous foodborne pathogens ranging from vegetative cells to  
77 viruses and spoilage causing enzymes. One problem that is found to cause a reduction in the shelf  
78 life of WM is the presence and growth of *Bacillus* sp. and its heat resistant spores in pasteurized,

79 sterilized as well as ultra-pasteurized milk (Pettersson et al., 1996; Scheldeman et al., 2004; Cullor,  
80 2011). The high pasteurization temperatures can easily destroy vegetative cells but can activate  
81 the spores, which leads to germination and growth (McGUIGGAN et al., 1994). Other  
82 disadvantages of pasteurization techniques are significant alteration in the sensorial and nutritional  
83 profile of the product, protein denaturation, undesired changes to milk fat globules, high  
84 operational and processing cost which makes it unfeasible for small scale dairy units (Garcia-  
85 Amezquita et al., 2009; Cappozzo et al., 2015; Gunter-Ward et al., 2018). Raw dairy products are  
86 prioritized by the consumers because of their typical sensorial characteristics and other health  
87 benefits such as decreased incidence of asthma, allergies, and respiratory infections which suggest  
88 immune benefits of dairy proteins are lost upon heat processing (Buchin et al., 1998; Braun-  
89 Fahrländer and Von Mutius, 2011). To preserve the benefits of raw dairy products without  
90 compromising the safety warrants the study of non-thermal technology for processing of dairy  
91 products (Gunter-ward et al., 2018). Interest in light-based technologies (UV-C irradiation) for  
92 liquid food processing has exponentially grown over the years is increasing due to lower energy  
93 consumption, cost-effectiveness, minimal effect on the quality of the products (Tran and Farid,  
94 2004; Keyser et al., 2008; Corrales et al., 2012; Feng et al., 2013; Ochoa-Velasco et al., 2014;  
95 Jermann et al., 2015; Islam et al., 2016). Several federal agencies have approved the use of UV-C  
96 technology for milk treatment. For example, European Food Safety Authority (EFSA) approved  
97 the use of UV-C at 253.7 nm for milk processing post pasteurization for the extension of shelf life  
98 and to improve the nutritional value as it increases the vitamin D3 content in the product (EFSA,  
99 2016, and Koutchma, 2018). Food Safety and Standards Authority of India approved the UV-C  
100 processing of raw milk processed via the Sure Pure UV system (Koutchma, 2018). In USA, any  
101 new technology for processing of grade A milk has to go through PMO and FDA clearance.

102 Many lab-scale studies on the UV-C processing of milk revealed the efficiency of the process  
103 (Choudhary et al., 2011; Bandla et al., 2012; Gunter-ward et al., 2018; Ansari et al., 2019). Still,  
104 the major challenges at the pilot scale are limited light penetration and mass transfer (Sizer and  
105 Balasubramanian, 1999) and fluence delivery per single pass. Milk is an opaque fluid with high  
106 absorption as well as scattering coefficient due to the presence of lipids, proteins and vitamins.  
107 UV light is absorbed by these micro and macro nutrients and creates UV gradients (Walstra and  
108 Jenness, 1984). Some studies reported that the major problem of UV-C processing is oxidation of  
109 fats and off-flavors (Bekbölet, 1990; Matak et al., 2005, 2007). However, the use of an efficient  
110 reactor design can improve mass transfer and mix the bulk field homogenously overcoming those  
111 challenges, delivering a uniform UV fluence (Koutchma, 2009). It is quite evident in the literature  
112 that Dean flow reactor is an efficient design where additional turbulence is generated when fluid  
113 passes through the coiled tube (Dean, 1927; Gopisetty et al., 2018; Vashisht et al., 2021). This is  
114 known as the Dean effect, and it is produced by the curvature radius between the inner and outer  
115 boundary layer (Dean, 1927). In our previous study we used a simulated fluid and scientifically  
116 proved that the Dean flow UV reactor distributes the fluence homogeneously demonstrated by the  
117 linear microbial inactivation kinetics (Vashisht et al., 2021). In reactor engineering, it is crucial to  
118 ensure that all the fluid particles receive the UV fluence within the acceptable limit i.e. minimal  
119 product damage and efficient microbial inactivation. An understanding of the fluid mechanical and  
120 flow properties is extremely important. Herein, we will evaluate the peroxidation and volatiles of  
121 WM, confirming the UV fluence (pasteurization equivalent dose). We hypothesize that effective  
122 fluence delivery in the system can inactivate the pathogens and preserve the quality of the product.  
123 The objectives of the present study are i) validation of the pilot-scale Dean flow UV system using

124 biosimetry approach, ii) evaluation of the microbial inactivation kinetics, iii) assessment of the  
125 volatile profile and lipid peroxidation of the UV irradiated whole milk.

## 126 **2. Materials and Methods**

### 127 2.1. Bacteriophage and endospores propagation

128 T1UV bacteriophage and *Bacillus cereus* ATCC 14579 endospores were used in this study. T1  
129 UV culture (@  $10^{10}$  pfu/mL) was purchased from GAP EnviroMicrobial Services Limited, London,  
130 ON, Canada and *Bacillus cereus* ATCC 14579 was obtained from American Type Culture  
131 Collection (ATCC) center (Manassas, VA). Culturing of endospores was conducting using a Bacto  
132 Brain Heart Infusion Broth (BHI, Beckton, Dickinson, Franklin Lakes, NJ) as a growth medium,  
133 incubation was done at 37 °C with aeration at 180 rpm. Nutrient-rich, a chemically defined medium  
134 known as Mineral Salts Medium (MSM) was used for sporulation. 20 mL of overnight grown  
135 culture was inoculated in 200 mL of MSM in 1 L of the flask. Incubation was be done at 30 °C  
136 with aeration at 180 rpm for 3 days. Dormant spores were purified by suspending the pellets in  
137 20% Nycodenz (VWR, Atlanta, GA) followed by 50% Nycodenz density gradient centrifugation  
138 at 14000 g for 45 minutes. Enumeration was done using a standard plate count method.

### 139 2.2. Optical properties

140 Optical properties (absorbance and reduced scattering) of the WM were evaluated at 254 nm  
141 by using a double beam spectrophotometer connected to a 6-inch integrating sphere. Inverse  
142 adding doubling technique was used to quantify the absorption coefficient, scattering coefficient,  
143 base-e. A series of thin quartz cuvettes were used to achieve a light transmission between 10 to  
144 14%. A MS-DOS based code was run to separate the absorption coefficient and reduced scattering  
145 coefficients. Light absorption and reflection were accounted for in the calculations.

$$146 \text{ Transmittance } \left( \frac{\%}{\text{cm}} \right) = (10^{-A}) \times 100 \quad (1)$$

147 where A stands for the absorbance (base 10) of the sample at 254 nm for a 1 cm path length. pH of  
148 the product was measured by using a pH meter (Jenway, Cole Palmer, OSA, UK). All the  
149 measurements were taken in triplicate to reduce error.

### 150 2.3. Organism sensitivity test

151 *Bacillus cereus* ATCC 14,579 and T1UV phage were evaluated for  $D_{10}$  values (dose required  
152 for 90 % inactivation or 10 % survival). Microorganisms were inoculated separately ( $@10^6$ - $10^7$   
153 CFU/mL or PFU/mL) in whole milk. The absorption coefficient of the final solution was measured  
154 using the UV-Vis. spectrophotometer (Thermo Scientific, Genesys 10S, Milwaukee, WI, US).  
155 Known UV fluence were delivered (3, 6, and 9 mJ/cm<sup>2</sup>) for both the microorganisms (Bolton and  
156 Linden, 2003). 5 mL of sample was exposed to UV using a Collimated Beam Apparatus (Trojan  
157 Technologies, London, ON, Canada), which contains a 25 W low-pressure mercury lamp. The  
158 suspension was stirred during irradiation using a magnetic stirrer to ensure equal UV volatil to all  
159 microorganisms. The  $D_{10}$  value was evaluated using the LINEST function of Microsoft Excel  
160 between the UV fluence delivered, and the log inactivation obtained. All the experiments were  
161 done in triplicate to reduce the error

### 162 2.4. UV- C Treatment

163 WM was exposed to UV-C light using the Dean flow UV system (Fig. 1). The system is a  
164 continuous UV reactor, consisting of a 500W low-pressure mercury lamp protected with stainless  
165 steel cylindrical blocker, a cooling fan, and a food-grade FEP (Fluorinated Ethylene Propylene)  
166 tube. The tube length is 26 m with an inner diameter ( $D_i$ ) of 0.64 cm, an outer diameter ( $D_o$ ) of  
167 0.74 cm, a wall thickness of 0.5 mm. The tube was wrapped around the centrally positioned lamp  
168 in a serpentine path. The diameter of the coil ( $D_c$ ) was 12.7 cm. The tubing was carefully  
169 engineered to have significant curves (bends) to induce mixing. The system also included a 4–20

170 mA current loop receiver and an indicator for output power lamp display. The electric supply of  
171 220 V (single phase), 60 Hz was used. The irradiance at the surface of the FEP tube was 22  
172 mW/cm<sup>2</sup>, measured using an International Light Technologies (Peabody, MA) IL-1700 radiometer  
173 with a SED 240 detector fitted with a NS254 filter. Transmittance (UVT%) of FEP tube was 65%,  
174 measured using a UV–Visible Spectrophotometer (Thermo Scientific, Genesys 10S, Milwaukee,  
175 WI, US). Therefore, the calculated UV intensity at the surface of the fluid was 14.3 mW/cm<sup>2</sup>. The  
176 total reactor volume was 0.80 L. The system was connected to an inlet, outlet, and a rinse tank (20  
177 L each). The output power at 254 nm was approximately 220 Watts at 254 nm. WM was treated  
178 at a flow rate of 0.75, 1.5, and 3 L/min (equivalent to 11.88, 23.77, 47.55 gph, respectively). The  
179 flowrate was controlled by Watson Marlow 730U peristaltic pump (Watson Marlow, Charlotte,  
180 NC, US). The pump was validated by using a bucket test in which time to collect a known volume  
181 of the fluid was estimated. CIP was done before starting the experiment as well as at the end. All  
182 experiments were conducted in triplicated to reduce random error. Dean number (De) evaluated as  
183 a function of Reynolds number (Re) and the geometric parameters D and D<sub>c</sub>, which stands for the  
184 hydraulic diameter of the tube (m) and diameter of the coil (m), respectively (Gopisetty et al.,  
185 2018, 2019). The following equation was used:

$$186 \quad D_e = R_e \left( \frac{\sqrt{D}}{D_c} \right) \quad (2)$$

187 Where Reynolds numbers (R<sub>e</sub>) was evaluated as:

$$188 \quad R_e = \frac{\rho V D}{\mu} \quad (3)$$

189 where ρ denotes the fluid density, μ denotes the dynamic viscosity, V is the fluid velocity, and D  
190 denotes the diameter of the tube. The R<sub>e</sub> of < 2100 represents laminar flow pattern, R<sub>e</sub> between  
191 2100-4000 shows transient flow conditions, and R<sub>e</sub> of > 4000 means turbulent flow conditions  
192 (Bandla et al., 2012; Pendyala et al., 2021; Vashisht et al., 2021). The residence time (RT) was 64,



193 32 and 16 seconds for 0.75 L/min. (11.88 gph), 1.5 L/min. (23.77 gph) and 3 L/min. (47.55 gph)  
194 respectively, which was evaluated by using the following equation:

$$195 \quad RT = \frac{V}{Q} \quad (4)$$

196 Where V is the volume (L); Q is the flow rate (L/min) Average flow velocity (vf) (m/sec.) was  
197 evaluated by using the following equation:

$$198 \quad V_f = \frac{Q}{\pi r^3 \times 60 \times 10^3} \quad (5)$$

199 Q is the flow rate of fluid in L/min. r is the tube's radius in m.

## 200 2.5. Determination of volatiles using electronic nose

201 Volatiles were evaluated by using an electronic nose (Heracles II, Alpha MOS, Toulouse,  
202 France). It consists of two columns working in parallel mode: a non-polar column (MXT5: 5%  
203 diphenyl, 95% methylpolysiloxane, 10 m length and 180  $\mu\text{m}$  diameter). The volatiles profile of  
204 treated samples (at 60 and 120  $\text{mJ}/\text{cm}^2$  of fluence) was compared with controlled (untreated)  
205 samples. 20 mL of vials were filled with 10 mL of the sample followed by sealing with septa screw  
206 cap using a crimper. The vials were equilibrated for 200 seconds at 50  $^\circ\text{C}$  in agitation chamber.  
207 Autosampler was used to inject the generated headspace aroma into the electronic nose column at  
208 a flow rate of 270  $\mu\text{L}/\text{s}$ . The column temperature program was 40 $^\circ\text{C}$  (1 min) – 2  $^\circ\text{C min}^{-1}$  – 200  $^\circ\text{C}$   
209 (3 min). The temperature of injector and detector was set at 180 $^\circ\text{C}$  and 220 $^\circ\text{C}$ , respectively. The  
210 chromatograms were obtained using Flame ionization detector (FID) and individual volatile profile  
211 including Kovats index, retention time and sensory description was evaluated by using  
212 AromaChemBase software. The analysis was done by using Alpha Soft (Alpha Soft version 3.0.0,  
213 Toulouse, France). All the samples were evaluated in triplicate to reduce error and all the values  
214 were mentioned in terms of relative area.

## 215 2.6. Determination of lipid peroxidation

216 Lipid peroxidation value was evaluated by a standard curve method using spectrophotometer.  
217 According, to Matak et al. (2007) value is measured in terms of MDA (malondialdehyde) and other  
218 reactive substance so standards of 50, 25, 12.5, 6.25, 3.125  $\mu\text{M}$  concentrations were prepared using  
219 MDA. 1 mL of irradiated whole milk was mixed and vortexed with 7 mL of 1% phosphoric acid  
220 followed by the addition of 2 mL of 42 mmol/L TBA (thiobarbituric acid). The solution was heated  
221 at 100°C for 60 minutes followed by cooling it down (by keeping on ice). The color was changed  
222 to pink, where the intensity was dependent upon the extent of lipid peroxidation. 4 mL of solution  
223 was added to the 4 mL of 1:12 mixture of 2 mol/L sodium hydroxide and methanol, it was vortex  
224 mixed for 10 seconds followed by centrifugation at 13000 g for 3 minutes. Supernatant was  
225 evaluated for absorbance at 532 nm using a UV-Vis spectrophotometer (Thermo Scientific,  
226 Genesys 10S, Milwaukee, WI, US) calibrated against blank.

## 227 2.7. Electrical energy per order ( $E_{EO}$ )

228  $E_{EO}$  was estimated to measure the kilowatt-hours of energy required to reduce the microbial  
229 population by one log (Bolton, 2010). This term is commonly used to assess electrical energy  
230 efficiency (Ward et al., 2019).  $E_{EO}$  value depends upon the nature of fluid under processing and  
231 the geometry of the reactor (Pendyala et al., 2021). Evaluation was done by using the equation  
232 given by Ward et al. (2019).

$$233 E_{EO} = \frac{P_{UV}}{F \times \log \frac{C_0}{C_t}} \quad (6)$$

234 where  $P_{UV}$  refers to the power of the electric lamp or total energy of the lamp and power supply  
235 (kW),  $F$  stands for volumetric flow rate ( $\text{m}^3/\text{h}$ .), and  $C_0$  and  $C_t$  stand for initial and final microbial  
236 concentration, respectively.

## 237 2.8. Statistical Analysis

238 All the treatments were conducted in replicates where each sample was independent and  
239 randomly assigned. All the values are reported as mean  $\pm$  std. deviation. For evaluation of effect  
240 of numerous treatments on REF, inactivation kinetics, lipid peroxidation and volatiles profile one-  
241 way ANOVA along with the Tukey HSD (honestly significant difference) at  $p < 0.05$  significance  
242 level.

### 243 **3. Result and Discussion**

#### 244 3.1. Optical properties of test fluid

245 Optical properties of WM are illustrated in Table 1. The absorption and reduced scattering  
246 coefficient were measured as  $23.7 \pm 0.3 \text{ cm}^{-1}$  (transmittance -  $2.5\text{E-}22 \text{ %/cm}$ ) and  $42.3 \pm 0.5 \text{ cm}^{-1}$   
247 respectively, with 12 % reflectance. The pH and fat content of the WM was  $6.73 \pm 0.17$  and 3.27  
248 %, respectively. Previous studies evaluated the absorption coefficient of whole milk without  
249 separating the reduced scattering coefficient and reported significantly higher values,  $220 \text{ cm}^{-1}$   
250 (Choudhary et al., 2011),  $326 \pm 1.5 \text{ cm}^{-1}$  (Ansari et al., 2019). Optical properties clearly show the  
251 opaque nature of the test fluid. WM significantly absorbs and scatters the UV photons. Suspended  
252 particles are mainly responsible for attenuation of UV light via scattering effect (Gunter-ward et  
253 al., 2018). If the product particles are larger than the UV wavelength then it leads to the forward  
254 scattering with amplified back scattering effect (Koutchma, 2009). Our results demonstrate high  
255 scattering effect of WM, due to fat globules and proteins (micellar casein) as reported in the  
256 literature (Gunter-ward et al., 2018; Ward et al., 2019). There could be a minor scattering effect  
257 due to dissolved minerals and sugar (lactose), however it can be ignored because their  
258 proportionate size is lesser than the fat and protein components (Gastélum-Barrios et al., 2020).

#### 259 3.2. Design and Development of dean flow reactor

260 Many literature studies used circular path coiled tube dean flow UV systems to evaluate  
261 microbial inactivation in milk (Choudhary et al., 2011; Bandla et al., 2012; Ansari et al., 2019).

262 To improve the Dean forces, in our previous proof-of-concept study we designed and developed  
263 pilot scale serpentine path coiled Dean flow UV system and evaluated its microbial inactivation  
264 efficiency. Previously, we irradiated fluids with absorption coefficient ranging from 6.5 to 17 cm<sup>-1</sup>  
265 <sup>1</sup> at commercial flow rates (Vashisht et al., 2021) and evaluated the system performance. In the  
266 current study, the system was challenged against a highly opaque fluid such a WM with an  
267 absorption coefficient of 23.7 cm<sup>-1</sup>. The initial design of the system consisted of a Teflon tubing  
268 (45% UV transmission) of 1 cm path length, 20 m total length and 18 cm coil diameter (Vashisht  
269 et al., 2021). The reactor system was modified where FEP tubing (65% UV transmission) was used  
270 to have high transmittivity. Tube length was increased to 26 m to increase the residence time and  
271 UV fluence/pass. The optical thickness of the fluid was reduced to 0.64 cm. This will allow higher  
272 penetration of photons in the bulk fluid. The coil diameter was reduced to 12.7 cm to increase the  
273 Dean effect (as Dean number is inversely proportional to coil diameter). The ratio of D to D<sub>c</sub>  
274 (where D stands for inner diameter of tubing (0.64 cm), and D<sub>c</sub> stands for the diameter of coil  
275 (12.7 cm)) of the designed reactor was 0.050 (0.64/12.7), which was in the range of 0.03–0.10  
276 demonstrating the initiation of Dean flow vortices during the experiments (Koutchma, 2009).  
277 Bandla et al. (2012) used Reynolds number as a parameter of turbulence but missed to evaluate  
278 the Dean number. This number is a significant parameter as it generates the additional turbulence  
279 hence the efficient mixing conditions (Dean 1927, Gopisetty et al., 2018, 2019). The evaluated  
280 Reynolds and Dean number for each flow rate was in the range of 2890-11562 and 648-2595,  
281 respectively (Table 2). This data revealed that the experiments were conducted at transient to fully  
282 turbulent conditions to provide efficient mass transfer (Dean, 1927; Patras et al., 2020). Turbulent  
283 flow conditions deliver higher velocity to the particles as compared to the mean velocity of  
284 individual particles providing efficient UV fluence distribution (Koutchma, 2009). Volume

285 average UV intensity depends on the relative positions of the particle and the UV lamps  
286 orientation. The UV fluence received by the micro-organisms depends on two main factors: the  
287 trajectories through the system and the REF rate (Vashisht et al., 2021). The incident radiation rate  
288 is dependent on the positions of the UV lamps within the UV system.

### 289 3.3. UV fluence validation at experimental flow rates

290 Biodosimetry study was conducted using *B. cereus* endospores to quantify delivered UV  
291 fluence. The  $D_{10}$  value of *B. cereus* endospore was quantified using a standard collimated beam  
292 system as  $8.91 \pm 0.07$  mJ/cm<sup>2</sup>, it was within the range as reported in the literature (Gopisetty et al.,  
293 2018; Pendyala et al., 2019, 2020, 2021). WM was inoculated with *B. cereus* ( $10^7$  cfu/mL) and it  
294 was passed through the UV systemlight at flow-rates of 0.75 L/min. (11.88 gph), 1.5 L/min. (23.77  
295 gph) and 3 L/min. (47.55 gph). REF was evaluated as a product of  $D_{10}$  value and log reduction  
296 ( $\text{Log}N_0-N$ ). Total REF was  $26 \pm 1.07$ ,  $14.5 \pm 0.53$  and  $10 \pm 0.27$  mJ/cm<sup>2</sup> at 11.88, 23.77 and 47.55  
297 gph of flow rate, respectively. It was observed that with the increase in flow rate, total REF was  
298 significantly reduced due to lower hydraulic retention times (Fig. 2a). In contrast, the REF rate  
299 (REF per sec.) was observed to be increase with the increase in flow rate attributed to the increase  
300 in turbulence and Dean forces intensity as demonstrated by the increased Reynolds and Dean  
301 number (Fig. 2b). Similar trends were reported by previous authors (Gunter-Ward et al., 2018;  
302 Ansari et al., 2019; Vashisht et al., 2021). According to Vashisht et al. (2021) Dean number plays  
303 a pivotal role in UV fluence distribution while the residence time directs the total REF for the  
304 inactivation of microbes hence a balance needs to be maintained between these process parameters.  
305 Herein, REF rate can be a useful factor for the determination of system's performance in terms of  
306 fluence distribution which is critical at commercial level. At 47.55 gph flow rate, the REF rate was  
307 1.54 and 1.38 times efficient than the 11.88 and 23.77 gph of flow rate. UV-C systems are suitable

308 for the treatment of opaque liquids when efficient mixing conditions that can surpass the potent  
309 intensity gradient and ensure effective fluence distribution (Vashisht et al., 2021). Inefficient  
310 mixing conditions will significantly affect the UV system performance and will result in non-linear  
311 inactivation kinetics of the target pathogen (Atilgan, 2013; Crook et al., 2015). Completing  
312 understanding of the UV system performance, knowledge of optical properties of the test fluids  
313 will allow accurate sizing of UV systems.

#### 314 3.4. Microbial Inactivation studies

315 Since better system performance was observed at higher flow rate, microbial inactivation  
316 studies were conducted at a flowrate of 47.55 gph using *B. cereus* endospores and T1UV virus  
317 particles (selected as a surrogate to *Salmonella*, *Listeria* and *Cronobacter*). Selection of pertinent  
318 microorganism is of utmost importance during validation studies (Patras et al., 2020). *B. cereus*  
319 endospores are most common pertinent bacterial spores present in milk and causes food safety and  
320 spoilage issues (Choudhary et al., 2011, Gunter-Ward et al., 2018; Patras et al., 2020) while  
321 *Salmonella* & *Listeria* are the pertinent vegetative microorganisms in milk (Patras et al., 2020).  
322 The  $D_{10}$  value of T1UV phage is similar to *Salmonella* and *Listeria* and therefore used in this  
323 research study.  $0.91 \pm 0.15$  and  $2.14 \pm 0.19$  log reduction per pass ( $R^2 > 0.99$ ,  $p < 0.05$ ) was  
324 observed for *B. cereus* and T1UV phage, respectively (Fig. 3a and 3b). Linear trend demonstrates  
325 uniform REF delivery during each pass. The kinetics of the UV inactivation are widely assumed  
326 for a first-order reactions with respect to the REF. The typical UV response curve can be  
327 represented in two ways: a log survival curve and a log inactivation curve

328 It is quite evident if the system is not efficient and does not provide good mixing conditions,  
329 then the desired UV fluence will not be delivered to the microbes which may result in lower  
330 inactivation rate at higher UV fluence (Bhullar et al., 2019) and tail may be observed in inactivation

331 curve. For instance, Makarapong et al. (2020) reported 4.7 and 4.6 log reduction of total microbial  
332 count in WM treated with 98 and 110 mJ/cm<sup>2</sup> of UV fluence. In our studies total log reduction of  
333 *B. cereus* and T1 UV phage were 2.75± 0.01 and 4.29 ± 0.09 after three and two passes,  
334 respectively. Previous Dean concept studies reported a significant log reduction of pathogenic  
335 microbes in dairy products. Ansari et al. (2019) reported *B. cereus* endospores log reduction of 6,  
336 2.90 and 1.1 in skim, cow and bovine milk, respectively where UV-C processing was used as  
337 hurdle technology. Bandla et al. (2012), reported 2.3 log reduction of standard plate count in raw  
338 cow milk given a UV-C fluence of 16.82 mJ/cm<sup>2</sup>. Matak et al. (2005) reported 5-log reduction of  
339 *Listeria monocytogenes* in goat milk given a UV-C fluence of 15.8 ± 1.6 mJ/cm<sup>2</sup> but the  
340 inactivation kinetics reported was non-linear which demonstrates that author failed to achieve  
341 efficient mixing conditions. Crook et al. (2015) used thin film reactor and reported 5-log reduction  
342 of *Listeria monocytogenes* and *Staphylococcus aureus* in WM, but the fluence was reported in J/L  
343 which is disparate to the commonly used standard unit i.e., mJ/cm<sup>2</sup>. In our previous studies we  
344 introduced the concept of Pasteurization and Sterilization Equivalent Dose referred to the fluence  
345 required for 5 log reduction of *S. Typhimurium* and 6 log reduction of *B. cereus* endospores,  
346 respectively (Vashisht et al., 2021). Therefore, in our studies at 47.55 gph of flow rate, 3 and 7  
347 passes are sufficient to provide a pasteurization and sterilization equivalent dose, respectively  
348 while another approach could be scaling up and increasing the length of tubing of the present  
349 system to increase the residence time and hence the delivered fluence per pass.

### 350 3.5. Lipid peroxidation

351 Milk consists of photosensitizers compounds such as riboflavin which can cause lipid  
352 peroxidation during UV-C light exposures and can deteriorate the quality and limits the shelf life  
353 of the dairy products (Bekbolet, 1990). The product of these reactions are hydroperoxides that can

354 decompose and form free-radicals which further causes auto oxidation and formation of off-  
355 flavoring compounds (Bekbolet, 1990). The oxidation reactions are prompt and usually take place  
356 when milk is exposed to metal surface or light (van Aardt et al., 2005). According to Cadwallader  
357 and Howard, 1998 autoxidation and light induces oxidation of unsaturated fatty acids of milk are  
358 primarily responsible for the origination of off flavor and reduction in nutritive compounds like  
359 ascorbic acid and riboflavin. Literature studies reported that the extent of lipid peroxidation is  
360 directly proportional to riboflavin content, and it is significantly affected by the exposure to UV  
361 light photons (van Aardt et al., 2005). In our studies the pertinent microorganism was *B. cereus*.  
362 Hence, sterilization equivalent dose for *B. cereus* was 53.46 mJ/cm<sup>2</sup> (6 x 8.91 mJ/cm<sup>2</sup>) (Vashisht  
363 et al., 2021). Therefore 60 mJ/cm<sup>2</sup>, 120 mJ/cm<sup>2</sup> and 180 mJ/cm<sup>2</sup> of UV fluence were selected for  
364 lipid peroxidation studies. The temperature during the UV light exposures processing was  
365 maintained at 4 °C to nullify the effect of lipase activity on fatty acids in WM (Deeth and Fitz-  
366 Gerald, 1995). Fig. 4 demonstrates the increase of lipid peroxidation in a polynomial trend (2 order  
367 equation) with the increase in the delivered UV fluence. Controlled samples had positive MDA  
368 value (0.110 ± 0.002 µM), which shows that the lipid peroxidation was initially present in the WM.  
369 At UV-C fluence of 60, 120 and 180 mJ/cm<sup>2</sup>, MDA concentration was 0.114 ± 0.004, 0.138 ±  
370 0.005, and 0.168 ± 0.002 µM, respectively. Fig 4b demonstrates that there was no significant  
371 difference (p<0.05) between the MDA concentration of the controlled samples and the samples  
372 treated with UV-C fluence of 60 mJ/cm<sup>2</sup>, enough to inactivate 6.73-log of *B. cereus* and 12.58-log  
373 of T1 phage. Makarapong et al. (2020) reported a significant lipid peroxidation in WM samples  
374 treated with 98 and 110 mJ/cm<sup>2</sup> of fluence. However, the evaluated fluence was significantly  
375 higher for the pasteurization equivalent dose reported in this study.

### 376 3.6. Volatiles Profile



377 Table 3 represents the volatiles profile of the untreated and irradiated WM samples. The  
378 irradiated samples were exposed to UV fluence of 60 and 120 mJ/cm<sup>2</sup> fluence prior to the  
379 evaluation of their volatiles profile. Overall, aldehyde concentration was not significantly ( $p >$   
380 0.05) affected UV irradiated samples. Primary aldehydes present in untreated samples were 2-  
381 methylpropanal, butanal, and acetaldehyde, while in irradiated samples, pentanal, hexanal, and  
382 butanal were majorly present. According to Kim and Morr (1996), hexanal can originally be  
383 present in the milk while its formation and overall concentration can be increased by the lipid  
384 peroxidation caused by the UV light treatment. Similar results were observed in our studies. There  
385 was a significant difference ( $p > 0.05$ ) in overall alcohol concentration in irradiated samples where  
386 1-propanol, n-butanol, and 1-hexanol were major contributors. Among ketones, butane-2,3-dione  
387 was majorly present in untreated samples, and its concentration relatively decreased in both  
388 irradiated samples (Vazquez-Landaverde et al., 2006). Pereda et al. (2008) reported only one  
389 carboxylic acid, i.e., hexanoic acid, in their study because of their less volatility and inefficiency  
390 of the system to extract these compounds. In our experiment, we detected seven of them where the  
391 major contributor was 2-methyl propanoic acid. Alteration in terpenes was not significant ( $p >$   
392 0.05) in irradiated samples treated with 60 mJ/cm<sup>2</sup> of UV fluence (Toso et al., 2002). Overall, there  
393 was no significant ( $p > 0.05$ ) difference in overall concentration of aldehydes, ketones, and  
394 terpenes of untreated and irradiated samples that received 60 mJ/cm<sup>2</sup> of UV fluence; however,  
395 increase in overall alcohols and esters and decrease in overall carboxylic acids concentration was  
396 observed which may be the consequences of light reactions.

### 397 3.7. Electrical Energy per order ( $E_{EO}$ ) evaluation

398 The evaluated  $E_{EO}$  values for both T1 UV phage and *B. cereus* at 47.55 gph of flow rate are  
399 shown in Table 4. T1 UV phage had lower  $E_{EO}$  value as compared to *B. cereus* attributed to its

400 lower  $D_{10}$  value. Lower  $E_{EO}$  value demonstrates the higher efficiency of the system. Since each  
401 microorganism has specific UV sensitivity ( $D_{10}$  value),  $E_{EO}$  value significantly varies with  
402 geometric parameters, design of reactor, processing conditions and nature of fluid under testing  
403 (Pendyala et al., 2021, Vashisht et al., 2021).  $E_{EO}$  value of *B. cereus* was evaluated for each flow  
404 rate (Table 4), where it was observed to be decreasing with the increased flow rate attributed to  
405 uniform distribution of fluence because of increased turbulence and Dean effect resulted in  
406 increased inactivation kinetics. This proves the efficiency of system was more at highest flow rate  
407 (47.88 gph) as compared to the lowest one (11.88 gph). At high flow rate two or more reactors are  
408 recommended in a series to increase the residence time and hence to deliver the targeted UV  
409 fluence. Therefore, a balance needs to be maintained between the chosen flow rate and number of  
410 reactors required in a series.

#### 411 **4. Conclusion**

412 A Dean flow UV system was evaluated and experimentally studied using WM as a test fluid  
413 due to its high scattering coefficients. Biodosimetry studies were conducted and test results showed  
414 that 47.55 gph of flow was the most efficient experimental flow rate for the coiled geometry. Linear  
415 inactivation trends were observed for *B. cereus* and T1UV phage demonstrating equivalent fluence  
416 during each pass. Lower  $E_{EO}$  value also signifies the higher electrical efficiency of the system.  
417 Further studies revealed that at  $60 \text{ mJ/cm}^2$  no significant effect on lipid peroxidation and volatiles  
418 profile was observed. The reported fluence is enough to inactivate 7.18 log population of *B. cereus*  
419 and 12.57 log of T1UV phage. Therefore, it can be concluded that commercial scale UV-C  
420 processing of opaque fluids like WM is feasible using an efficient reactor design such as Dean  
421 flow system. Further studies on sensory quality of UV exposed WM is warranted in the future.

## 422 **Acknowledgments**

423 This project was funded under the Agriculture and Food Research Initiative (Food Safety  
424 Challenge Area), USDA, Award numbers; 2018-38821-27732, and 2019-69015-29233. The  
425 authors would like to thank Trojan Technologies for providing valuable guidance in this project.

426 **Note:** There are no conflicts to declare.

## 427 **5. References**

428 Ansari, J. A., Ismail, M., & Farid, M. (2019). Investigate the efficacy of UV pretreatment on  
429 thermal inactivation of *Bacillus subtilis* spores in different types of milk. *Innovative Food Science  
430 & Emerging Technologies*, 52, 387-393.

431 Atilgan, M. R. (2013). Design of a continuous flow UV reactor for opaque liquid foods by using  
432 computational fluid dynamics (CFD).

433 Bandla, S., Choudhary, R., Watson, D. G., & Haddock, J. (2012). UV-C treatment of soymilk in  
434 coiled tube UV reactors for inactivation of *Escherichia coli* W1485 and *Bacillus cereus*  
435 endospores. *LWT-food Science and Technology*, 46(1), 71-76.

436 Bekbölet, M. (1990). Light effects on food. *Journal of food protection*, 53(5), 430-440.

437 Bermúdez-Aguirre, D., Corradini, M. G., Mawson, R., & Barbosa-Cánovas, G. V. (2009).  
438 Modeling the inactivation of *Listeria innocua* in raw whole milk treated under thermo-  
439 sonication. *Innovative Food Science & Emerging Technologies*, 10(2), 172-178.

440 Bhullar, M. S., Patras, A., Kilonzo-Nthenge, A., Pokharel, B., & Sasges, M. (2019). Ultraviolet  
441 inactivation of bacteria and model viruses in coconut water using a collimated beam system. *Food  
442 Science and Technology International*, 25(7), 562-572

- 443 Bilbao-Sáinz, C., Younce, F. L., Rasco, B., & Clark, S. (2009). Protease stability in bovine milk  
444 under combined thermal-high hydrostatic pressure treatment. *Innovative food science & emerging*  
445 *technologies*, *10*(3), 314-320.
- 446 Bogahawaththa, D., Buckow, R., Chandrapala, J., & Vasiljevic, T. (2018). Comparison between  
447 thermal pasteurization and high pressure processing of bovine skim milk in relation to denaturation  
448 and immunogenicity of native milk proteins. *Innovative Food Science & Emerging*  
449 *Technologies*, *47*, 301-308.
- 450 Bolton, J. R. (2010). Ultraviolet Applications Handbook ICC Lifelong Learn. Inc., Edmonton, AB,  
451 Canada.
- 452 Bolton, J. R., & Linden, K. G. (2003). Standardization of methods for fluence (UV dose)  
453 determination in bench-scale UV experiments. *Journal of environmental engineering*, *129*(3),  
454 209-215.
- 455 Braun- Fahrländer, C., & Von Mutius, E. (2011). Can farm milk consumption prevent allergic  
456 diseases? *Clinical & Experimental Allergy*, *41*(1), 29-35.
- 457 Buchin, S., Delague, V., Duboz, G., Berdague, J. L., Beuvier, E., Pochet, S., & Grappin, R. (1998).  
458 Influence of pasteurization and fat composition of milk on the volatile compounds and flavor  
459 characteristics of a semi-hard cheese. *Journal of Dairy Science*, *81*(12), 3097-3108.
- 460 Cadwallader, K. R., & Howard, C. L. (1998). Analysis of aroma-active components of light-  
461 activated milk.
- 462 Cappozzo, J. C., Koutchma, T., & Barnes, G. (2015). Chemical characterization of milk after  
463 treatment with thermal (HTST and UHT) and nonthermal (turbulent flow ultraviolet) processing  
464 technologies. *Journal of Dairy Science*, *98*(8), 5068-5079.

- 465 Choudhary, R., & Bandla, S. (2012). Ultraviolet pasteurization for food industry. *International*  
466 *Journal of Food Science and Nutrition Engineering*, 2(1), 12-15.
- 467 Choudhary, R., Bandla, S., Watson, D. G., Haddock, J., Abughazaleh, A., & Bhattacharya, B.  
468 (2011). Performance of coiled tube ultraviolet reactors to inactivate Escherichia coli W1485 and  
469 Bacillus cereus endospores in raw cow milk and commercially processed skimmed cow  
470 milk. *Journal of food engineering*, 107(1), 14-20.
- 471 Corrales, M., de Souza, P. M., Stahl, M. R., & Fernández, A. (2012). Effects of the  
472 decontamination of a fresh tiger nuts' milk beverage (horchata) with short wave ultraviolet  
473 treatments (UV-C) on quality attributes. *Innovative Food Science & Emerging Technologies*, 13,  
474 163-168.
- 475 Cosentino, S., Mulargia, A. F., Pisano, B., Tuveri, P., & Palmas, F. (1997). Incidence and  
476 biochemical characteristics of Bacillus flora in Sardinian dairy products. *International journal of*  
477 *food microbiology*, 38(2-3), 235-238.
- 478 Crielly, E. M., Logan, N. A., & Anderton, A. (1994). Studies on the Bacillus flora of milk and  
479 milk products. *Journal of applied bacteriology*, 77(3), 256-263.
- 480 Crook, J. A., Rossitto, P. V., Parko, J., Koutchma, T., & Cullor, J. S. (2015). Efficacy of ultraviolet  
481 (UV-C) light in a thin-film turbulent flow for the reduction of milkborne pathogens. *Foodborne*  
482 *pathogens and disease*, 12(6), 506-513.
- 483 Cullor, J. (2011). Effects of ultraviolet light treatment on milk and microbiological quality.  
484 In *Proc. 3rd Int. Symp. Mastitis and Milk Quality, St. Louis, MO. National Mastitis Council,*  
485 *Madison, WI.*

- 486 Dean, W. R. (1927). XVI. Note on the motion of fluid in a curved pipe. *The London, Edinburgh,*  
487 *and Dublin Philosophical Magazine and Journal of Science*, 4(20), 208-223.
- 488 Deeth, H. C., Fitz-Gerald, C. H., & Fox, P. F. (1995). *Advanced dairy chemistry*.
- 489 Delorme, M. M., Guimarães, J. T., Coutinho, N. M., Balthazar, C. F., Rocha, R. S., Silva, R., ... &  
490 Cruz, A. G. (2020). Ultraviolet radiation: An interesting technology to preserve quality and safety  
491 of milk and dairy foods. *Trends in food science & technology*, 102, 146-154.
- 492 EFSA, 2016. Safety of UV-treated milk as a novel food pursuant to Regulation (EC) No 258/97.  
493 <http://www.efsa.europa.eu/en/efsajournal/pub/4370>. *EFSA Journal* 2016;14(1):4370
- 494 Feng, M., Ghafoor, K., Seo, B., Yang, K., & Park, J. (2013). Effects of ultraviolet-C treatment in  
495 Teflon®-coil on microbial populations and physico-chemical characteristics of watermelon  
496 juice. *Innovative Food Science & Emerging Technologies*, 19, 133-139.
- 497 Garcia-Amezquita, L. E., Primo-Mora, A. R., Barbosa-Cánovas, G. V., & Sepulveda, D. R. (2009).  
498 Effect of nonthermal technologies on the native size distribution of fat globules in bovine cheese-  
499 making milk. *Innovative Food Science & Emerging Technologies*, 10(4), 491-494.
- 500 Gastélum-Barrios, A., Soto-Zarazúa, G. M., Escamilla-García, A., Toledano-Ayala, M., Macías-  
501 Bobadilla, G., & Jauregui-Vazquez, D. (2020). Optical Methods Based on Ultraviolet, Visible, and  
502 Near-Infrared Spectra to Estimate Fat and Protein in Raw Milk: A Review. *Sensors*, 20(12), 3356.
- 503 Gopisetty, V. V. S., Patras, A., Kilonzo-Nthenge, A., Yannam, S., Bansode, R. R., Sages, M., ...  
504 & Xiao, H. (2018). Impact of UV-C irradiation on the quality, safety, and cytotoxicity of cranberry-  
505 flavored water using a novel continuous flow UV system. *LWT*, 95, 230-239.

- 506 Gopisetty, V. V. S., Patras, A., Pendyala, B., Kilonzo-Nthenge, A., Ravi, R., Pokharel, B., ... &  
507 Sasges, M. (2019). UV-C irradiation as an alternative treatment technique: Study of its effect on  
508 microbial inactivation, cytotoxicity, and sensory properties in cranberry-flavored  
509 water. *Innovative Food Science & Emerging Technologies*, 52, 66-74.
- 510 Griffiths, M. W. (1992). *Bacillus cereus* in liquid milk and other milk products. *Bull. Int. Dairy*  
511 *Fed.*, 275, 36-38.
- 512 Gunter- Ward, D. M., Patras, A., S. Bhullar, M., Kilonzo- Nthenge, A., Pokharel, B., & Sasges,  
513 M. (2018). Efficacy of ultraviolet (UV- C) light in reducing foodborne pathogens and model  
514 viruses in skim milk. *Journal of Food Processing and Preservation*, 42(2), e13485.
- 515 Islam, M. S., Patras, A., Pokharel, B., Wu, Y., Vergne, M. J., Shade, L., ... & Sasges, M. (2016).  
516 UV-C irradiation as an alternative disinfection technique: Study of its effect on polyphenols and  
517 antioxidant activity of apple juice. *Innovative Food Science & Emerging Technologies*, 34, 344-  
518 351.
- 519 Jermann, C., Koutchma, T., Margas, E., Leadley, C., & Ros-Polski, V. (2015). Mapping trends in  
520 novel and emerging food processing technologies around the world. *Innovative Food Science &*  
521 *Emerging Technologies*, 31, 14-27.
- 522 Keyser, M., Müller, I. A., Cilliers, F. P., Nel, W., & Gouws, P. A. (2008). Ultraviolet radiation as  
523 a non-thermal treatment for the inactivation of microorganisms in fruit juice. *Innovative Food*  
524 *Science & Emerging Technologies*, 9(3), 348-354.
- 525 Kim, Y. D., & Morr, C. V. (1996). Dynamic headspace analysis of light activated flavor in  
526 milk. *International Dairy Journal*, 6(2), 185-193.

- 527 Koutchma, T. (2009). Advances in ultraviolet light technology for non-thermal processing of  
528 liquid foods. *Food and Bioprocess Technology*, 2(2), 138-155.
- 529 Koutchma, T. (2018). Status of international regulations for ultraviolet treatment of foods. *IUVA*  
530 *News*, 20, 13-16.
- 531 Makarapong, D., Tantayanon, S., Gowanit, C., & Inchaisri, C. (2020). Development of an  
532 innovative apparatus using UV- C for controlling the number of microorganisms in raw milk after  
533 milking. *International Journal of Dairy Technology*, 73(1), 301-305.
- 534 Matak, K. E., Churey, J. J., Worobo, R. W., Sumner, S. S., Hovingh, E., Hackney, C. R., & Pierson,  
535 M. D. (2005). Efficacy of UV light for the reduction of *Listeria monocytogenes* in goat's  
536 milk. *Journal of Food Protection*, 68(10), 2212-2216.
- 537 Matak, K. E., Sumner, S. S., Duncan, S. E., Hovingh, E., Worobo, R. W., Hackney, C. R., &  
538 Pierson, M. D. (2007). Effects of ultraviolet irradiation on chemical and sensory properties of goat  
539 milk. *Journal of Dairy Science*, 90(7), 3178-3186.
- 540 McGUIGGAN, J. T. M., GILMOUR, A., & LAWRENCE, L. M. (1994). Factors influencing the  
541 recovery of psychrotrophic, mesophilic and thermophilic *Bacillus* spp from bulk raw  
542 milk. *International Journal of Dairy Technology*, 47(4), 111-116.
- 543 Munir, M., Nadeem, M., Qureshi, T. M., Leong, T. S., Gamlath, C. J., Martin, G. J., &  
544 Ashokkumar, M. (2019). Effects of high pressure, microwave and ultrasound processing on  
545 proteins and enzyme activity in dairy systems—A review. *Innovative Food Science & Emerging*  
546 *Technologies*, 57, 102192.



- 547 Ochoa-Velasco, C. E., Cruz-González, M., & Guerrero-Beltrán, J. Á. (2014). Ultraviolet-C light  
548 inactivation of *Escherichia coli* and *Salmonella typhimurium* in coconut (*Cocos nucifera* L.)  
549 milk. *Innovative Food Science & Emerging Technologies*, 26, 199-204.
- 550 Oliver, S. P., Jayarao, B. M., & Almeida, R. A. (2005). Foodborne pathogens in milk and the dairy  
551 farm environment: food safety and public health implications. *Foodborne Pathogens &*  
552 *Disease*, 2(2), 115-129.
- 553 Patras, A., Bhullar, M. S., Pendyala, B., & Crapulli, F. (2020). Ultraviolet treatment of opaque  
554 liquid foods: from theory to practice. Reference Module in Food Science.
- 555 Pendyala, B., Patras, A., Gopisetty, V. V. S., & Sasges, M. (2021). UV-C inactivation of  
556 microorganisms in a highly opaque model fluid using a pilot scale ultra-thin film annular reactor:  
557 Validation of delivered dose. *Journal of Food Engineering*, 294, 110403.
- 558 Pendyala, B., Patras, A., Gopisetty, V. V. S., Sasges, M., & Balamurugan, S. (2019). Inactivation  
559 of *Bacillus* and *Clostridium* spores in coconut water by ultraviolet light. *Foodborne pathogens and*  
560 *disease*, 16(10), 704-711.
- 561 Pendyala, B., Patras, A., Ravi, R., Gopisetty, V. V. S., & Sasges, M. (2020). Evaluation of UV-C  
562 Irradiation Treatments on Microbial Safety, Ascorbic Acid, and Volatile Aromatics Content of  
563 Watermelon Beverage. *Food and Bioprocess Technology*, 13(1), 101-111.
- 564 Pereda, J., Jaramillo, D. P., Quevedo, J. M., Ferragut, V., Guamis, B., & Trujillo, A. J. (2008).  
565 Characterization of volatile compounds in ultra-high pressure homogenized milk. *International*  
566 *dairy journal*, 18(8), 826-834.

- 567 Pettersson, B., Lembke, F., Hammer, P., Stackebrandt, E., & Priest, F. G. (1996). *Bacillus*  
568 *sporothermodurans*, a new species producing highly heat-resistant endospores. *International*  
569 *Journal of Systematic and Evolutionary Microbiology*, *46*(3), 759-764.
- 570 Scallan, E., Hoekstra, R. M., Angulo, F. J., Tauxe, R. V., Widdowson, M. A., Roy, S. L., ... &  
571 Griffin, P. M. (2011). Foodborne illness acquired in the United States—major  
572 pathogens. *Emerging infectious diseases*, *17*(1), 7.
- 573 Scheldeman, P., Goossens, K., Rodriguez-Diaz, M., Pil, A., Goris, J., Herman, L., ... &  
574 Heyndrickx, M. (2004). *Paenibacillus lactis* sp. nov., isolated from raw and heat-treated  
575 milk. *International Journal of Systematic and Evolutionary Microbiology*, *54*(3), 885-891.
- 576 Shanmugam, A., Chandrapala, J., & Ashokkumar, M. (2012). The effect of ultrasound on the  
577 physical and functional properties of skim milk. *Innovative Food Science & Emerging*  
578 *Technologies*, *16*, 251-258.
- 579 Sizer, C. E., & Balasubramaniam, V. M. (1999). New intervention processes for minimally  
580 processed juices. *Food Technology (Chicago)*, *53*(10), 64-67.
- 581 Toso, B., Procida, G., & Stefanon, B. (2002). Determination of volatile compounds in cows' milk  
582 using headspace GC-MS. *Journal of Dairy Research*, *69*(4), 569-577.
- 583 Tran, M. T. T., & Farid, M. (2004). Ultraviolet treatment of orange juice. *Innovative Food Science*  
584 *& Emerging Technologies*, *5*(4), 495-502.
- 585 Van Aardt, M., Duncan, S. E., Marcy, J. E., Long, T. E., O'Keefe, S. F., & Nielsen-Sims, S. R.  
586 (2005). Effect of antioxidant ( $\alpha$ -tocopherol and ascorbic acid) fortification on light-induced flavor  
587 of milk. *Journal of dairy science*, *88*(3), 872-880.

588 Vashisht, P., Pendyala, B., Gopisetty, V. V. S., & Patras, A. (2021). Modeling and validation of  
589 delivered fluence of a continuous Dean flow pilot scale UV system: monitoring fluence by  
590 biodosimetry approach. *Food Research International*, *148*, 110625.

591 Vazquez-Landaverde, P. A., Torres, J. A., & Qian, M. C. (2006). Effect of high-pressure–  
592 moderate-temperature processing on the volatile profile of milk. *Journal of Agricultural and Food*  
593 *chemistry*, *54*(24), 9184-9192.

594 Walstra, P., & Jenness, R. (1984). *Dairy chemistry & physics*. John Wiley & Sons.

595 Ward, D. M., Patras, A., Kilonzo- Nthenge, A., Yannam, S. K., Pan, C., Xiao, H., & Sasges, M.  
596 (2019). UV- C treatment on the safety of skim milk: Effect on microbial inactivation and  
597 cytotoxicity evaluation. *Journal of Food Process Engineering*, *42*(4), e12944.

## 598 **Figure legends**

599 **Fig. 1.** Experimental setup of Dean flow UV system.

600 **Fig. 2.** Effect of flow rate on delivered fluence (bio studies) a) REF b) REF rate

601 Note: REF rate = REF/residence time

602 **Fig. 3.** Microbial inactivation per each pass of WM a) *B. cereus* endospores b) T1UV phage

603 **Fig. 4.** Variation of malondialdehyde concentration in irradiated milk samples with respect to the  
604 delivered UV fluence.

605

606

607

608

609

610 **Tables**

611 **Table 1.** Optical and Physio-chemical properties of whole milk

| Optical Properties           | Value       | Units            |
|------------------------------|-------------|------------------|
| Absorption coefficient       | 23.7 ± 0.3  | cm <sup>-1</sup> |
| Scattering coefficient       | 42.3 ± 0.5  | cm <sup>-1</sup> |
| Transmittance                | 2.5E-22     | %                |
| Physio-chemical properties   |             |                  |
| Refractive Index (at 254 nm) | 1.35        |                  |
| pH                           | 6.73 ± 0.17 |                  |
| Fat                          | 3.27        | %                |

612 Data reported as mean±stdev

613

614 **Table 2.** Flow properties of the WM under testing

| Flow rate<br>(L/min.) | Residence time<br>(sec.) | Velocity of flow<br>(m/sec.) | Reynolds number | Dean number |
|-----------------------|--------------------------|------------------------------|-----------------|-------------|
| 0.75                  | 64                       | 0.39                         | 2890            | 648         |
| 1.5                   | 32                       | 0.78                         | 5781            | 1297        |
| 3                     | 16                       | 1.55                         | 11562           | 2595        |

615

616 **Table 3.** Volatiles profile comparison of the untreated milk samples with irradiated samples treated  
617 with UV fluence of 60 and 120 mJ/cm<sup>2</sup>.

| Volatiles        | Control<br>(untreated Raw milk) | Treatments               |                          |
|------------------|---------------------------------|--------------------------|--------------------------|
|                  |                                 | UV Fluence               |                          |
|                  |                                 | 60 mJ/cm <sup>2</sup>    | 120 mJ/cm <sup>2</sup>   |
| Aldehydes        |                                 |                          |                          |
| 2-methylpropanal | 12.37 ± 1.32 <sup>a</sup>       | 4.28 ± 0.03 <sup>b</sup> | 3.14 ± 0.0 <sup>c</sup>  |
| Butanal          | 7.45 ± 0.06 <sup>a</sup>        | 4.90 ± 0.14 <sup>b</sup> | 6.05 ± 0.49 <sup>a</sup> |
| Acetaldehyde     | 5.12 ± 0.18 <sup>a</sup>        | 3.35 ± 0.18 <sup>b</sup> | 2.39 ± 0.13 <sup>c</sup> |

|                   |                    |                    |                    |
|-------------------|--------------------|--------------------|--------------------|
| Pentanal          | $2.12 \pm 0.01^a$  | $9.30 \pm 0.18^b$  | $10.15 \pm 0.15^c$ |
| Hexanal           | $1.77 \pm 0.06^a$  | $6.93 \pm 0.00^b$  | $6.36 \pm 0.36^b$  |
| Heptanal          | $1.57 \pm 0.05^a$  | $2.45 \pm 0.15^b$  | $2.50 \pm 0.17^b$  |
| Citronellal       | $1.16 \pm 0.35^a$  | -                  | $0.40 \pm 0.08^b$  |
| Octanal           | $0.91 \pm 0.08^a$  | $0.56 \pm 0.15^b$  | $0.46 \pm 0.09^c$  |
| 2-Decenal         | $0.74 \pm 0.02^a$  | -                  | -                  |
| 3-methyl butanal  | $0.58 \pm 0.03^a$  | -                  | -                  |
| <b>Total</b>      | $34.27 \pm 1.84^a$ | $34.61 \pm 0.70^a$ | $35.09 \pm 1.36^a$ |
| <b>Alcohols</b>   |                    |                    |                    |
| 1-Propanol        | $6.32 \pm 0.37^a$  | $7.90 \pm 0.27^b$  | $7.82 \pm 0.37^b$  |
| n-butanol         | $5.83 \pm 0.61^a$  | $12.78 \pm 0.08^b$ | $13.88 \pm 0.57^b$ |
| 1-Hexanol         | $3.60 \pm 0.28^a$  | $5.36 \pm 0.19^b$  | $2.12 \pm 0.33^a$  |
| 3-heptanol        | $2.01 \pm 0.04^a$  | $1.43 \pm 0.06^b$  | $1.09 \pm 0.07^c$  |
| 1-nonanol         | $1.47 \pm 0.06^a$  | -                  | -                  |
| Methyl eugenol    | $1.44 \pm 0.60^a$  | $1.49 \pm 0.24^a$  | $1.59 \pm 0.00^b$  |
| Ethyl propanoate  | $0.48 \pm 0.03^a$  | $3.40 \pm 0.02^b$  | $4.11 \pm 0.05^c$  |
| 1-Decanol         | $0.44 \pm 0.03^a$  | -                  | -                  |
| 1-octanol         | $0.36 \pm 0.10^a$  | -                  | -                  |
| <b>Total</b>      | $21.95 \pm 1.21^a$ | $32.36 \pm 0.60^b$ | $30.61 \pm 1.54^b$ |
| <b>Ketones</b>    |                    |                    |                    |
| butane-2,3-dione  | $2.98 \pm 0.25^a$  | $1.73 \pm 0.01^b$  | $1.67 \pm 0.00^b$  |
| Pentan-2-one      | $1.59 \pm 0.01^a$  | $1.31 \pm 0.02^b$  | $1.4 \pm 0.01^b$   |
| Delta Nonalactone | $1.52 \pm 0.26^a$  | $2.19 \pm 0.14^b$  | $1.18 \pm 0.15^c$  |
| Nonan-2-one       | $1.32 \pm 0.39^a$  | $1.17 \pm 0.00^a$  | $1.08 \pm 0.08^a$  |
| Butan-2-one       | $1.21 \pm 0.04^a$  | $1.21 \pm 0.04^a$  | $1.60 \pm 0.11^b$  |
| 2,3-Pentanedione  | $0.82 \pm 0.03^a$  | $1.3 \pm 0.02^b$   | $1.37 \pm 0.31^b$  |
| 2-Heptanone       | $0.61 \pm 0.03^a$  | $0.55 \pm 0.07^a$  | $0.51 \pm 0.03^a$  |
| Undecan-2-one     | $0.63 \pm 0.02^a$  | $0.63 \pm 0.34^a$  | $0.52 \pm 0.17^a$  |
| <b>Total</b>      | $10.68 \pm 0.95^a$ | $10.09 \pm 0.55^a$ | $9.33 \pm 0.52^b$  |
| <b>Esters</b>     |                    |                    |                    |
| Methyl            | $5.09 \pm 0.06^a$  | $2.06 \pm 0.10^b$  | $1.64 \pm 0.0^c$   |

|                        |                           |                           |                           |
|------------------------|---------------------------|---------------------------|---------------------------|
| 2-methylbutanoate      |                           |                           |                           |
| Butyl acetate          | 1.68 ± 0.08 <sup>a</sup>  | 1.31 ± 0.04 <sup>b</sup>  | 1.15 ± 0.04 <sup>c</sup>  |
| Ethyl isobutyrate      | 1.24 ± 0.18 <sup>a</sup>  | 2.00 ± 0.05 <sup>b</sup>  | 1.1 ± 0.03 <sup>a</sup>   |
| Ethyl butyrate         | 1.18 ± 0.12 <sup>a</sup>  | 4.79 ± 0.15 <sup>b</sup>  | 6.34 ± 0.25 <sup>c</sup>  |
| Isopropyl acetate      | 0.43 ± 0.10 <sup>a</sup>  | 3.38 ± 0.08 <sup>b</sup>  | 2.91 ± 0.40 <sup>c</sup>  |
| Ethyl Acetate          | 0.83 ± 0.07 <sup>a</sup>  | -                         | -                         |
| Isoamyl acetate        | 0.75 ± 0.10 <sup>a</sup>  | 0.86 ± 0.03 <sup>a</sup>  | 0.88 ± 0.37 <sup>a</sup>  |
| Butyl butanoate        | 0.58 ± 0.21 <sup>a</sup>  | -                         | -                         |
| ethyl heptanoate       | 0.49 ± 0.02 <sup>a</sup>  | -                         | -                         |
| Total                  | 12.27 ± 0.64 <sup>a</sup> | 14.5 ± 0.45 <sup>b</sup>  | 14.02 ± 0.97 <sup>c</sup> |
| Carboxylic acid        |                           |                           |                           |
| 2-methylpropanoic acid | 4.18 ± 0.28 <sup>a</sup>  | 5.38 ± 0.01 <sup>b</sup>  | 5.95 ± 0.20 <sup>b</sup>  |
| Acetic Acid            | 1.67 ± 0.07 <sup>a</sup>  | -                         | -                         |
| Propanoic acid         | 0.81 ± 0.31 <sup>a</sup>  | -                         | -                         |
| Hexanoic acid          | 0.62 ± 0.01 <sup>a</sup>  | 0.57 ± 0.17 <sup>a</sup>  | 0.50 ± 0.17 <sup>b</sup>  |
| Octanoic Acid          | 0.84 ± 0.13 <sup>a</sup>  | 0.59 ± 0.23 <sup>b</sup>  | 0.59 ± 0.07 <sup>b</sup>  |
| Butanoic acid          | 0.92 ± 0.01 <sup>a</sup>  | -                         | -                         |
| Dodecanoic acid        | 0.31 ± 0.05 <sup>a</sup>  | -                         | -                         |
| Total                  | 9.35 ± 0.71 <sup>a</sup>  | 6.54 ± 0.27 <sup>b</sup>  | 7.04 ± 0.31 <sup>c</sup>  |
| Terpenes               |                           |                           |                           |
| α-Terpinene            | 0.84 ± 0.02 <sup>a</sup>  | 0.94 ± 0.19 <sup>a</sup>  | 2.12 ± 0.01 <sup>b</sup>  |
| α- Phellandrene        | 1.38 ± 0.23 <sup>a</sup>  | 1.45 ± 0.61 <sup>a</sup>  | 1.67 ± 0.15 <sup>a</sup>  |
| Total                  | 2.22 ± 0.25 <sup>a</sup>  | 2.39 ± 0.80 <sup>a</sup>  | 3.79 ± 0.14 <sup>b</sup>  |
| Grand Total            | 90.26 ± 1.31 <sup>a</sup> | 97.09 ± 0.77 <sup>b</sup> | 95.76 ± 2.38 <sup>c</sup> |

618 Values are mean ± standard deviation, n = 3, mean values in a row with different letters are  
 619 significantly different at p < 0.05.

620

621 **Table 4.** E<sub>EO</sub> of a Dean flow system to inactivate targeted microorganism under flow rate

622 conditions.

| Microorganism | Flow rate (gph) | E <sub>EO</sub> (kWh/m <sup>3</sup> /log) |
|---------------|-----------------|-------------------------------------------|
|---------------|-----------------|-------------------------------------------|

|                                   |       |             |
|-----------------------------------|-------|-------------|
| T1 UV phage                       | 47.55 | 1.19 ± 0.11 |
| <i>Bacillus cereus</i> ATCC 14579 | 47.55 | 2.67 ± 0.12 |
| <i>Bacillus cereus</i> ATCC 14579 | 23.77 | 2.94 ± 0.05 |
| <i>Bacillus cereus</i> ATCC 14579 | 11.88 | 3.27 ± 0.48 |

623 Data reported as mean ± standard deviation

624 **Figures**

625 **Fig. 1**

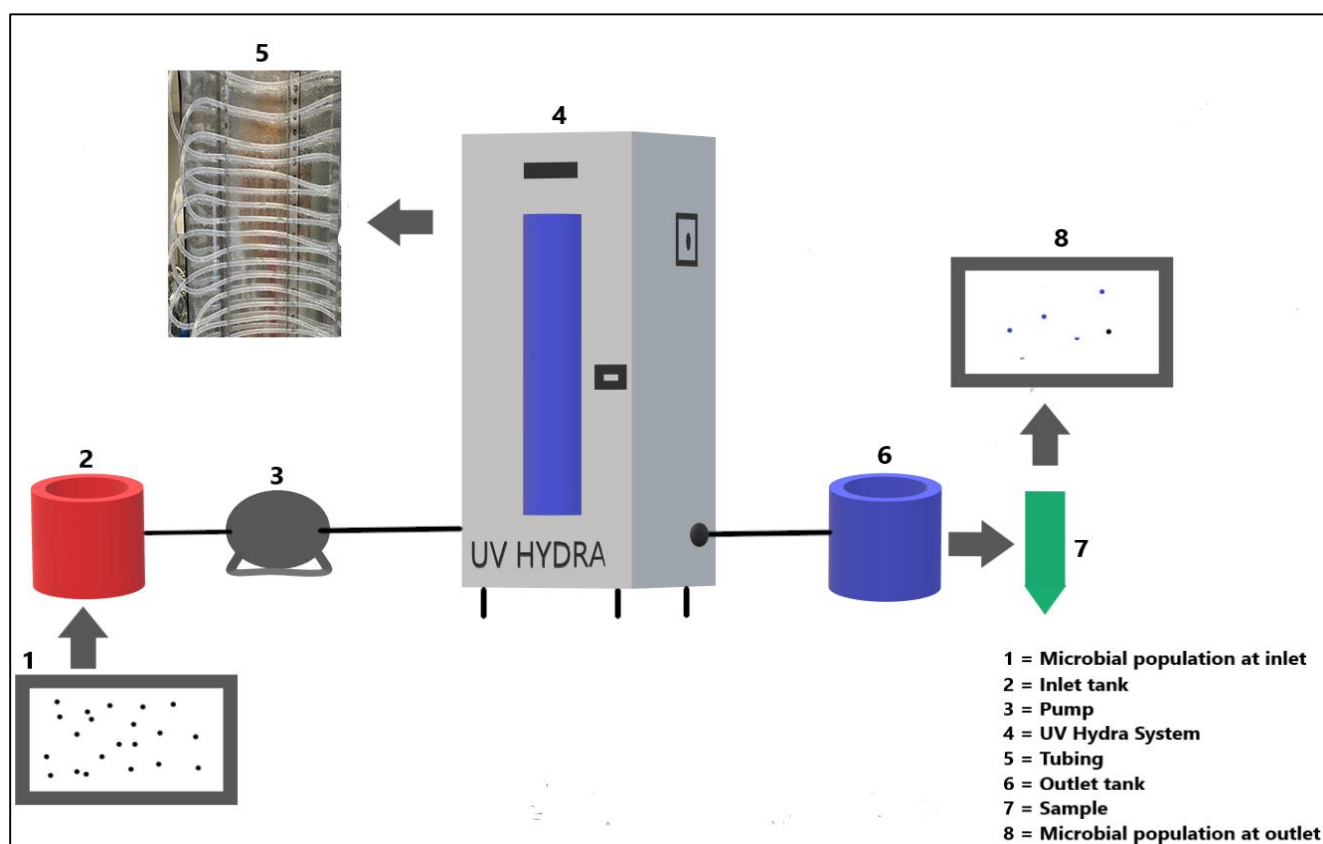

626

627

628

629

630

631 Fig. 2

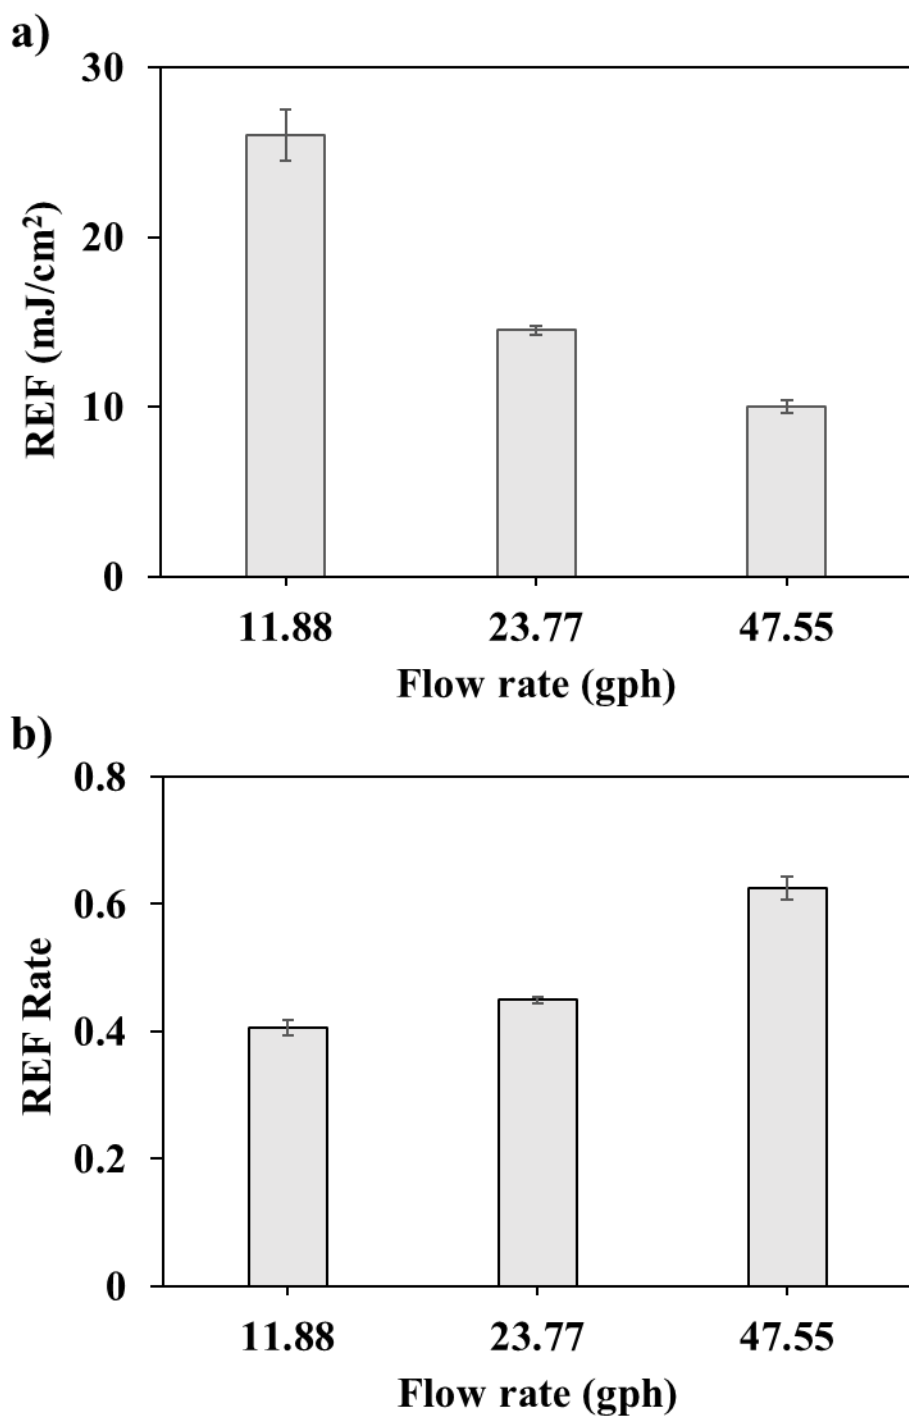

632

633



634 **Fig. 3**

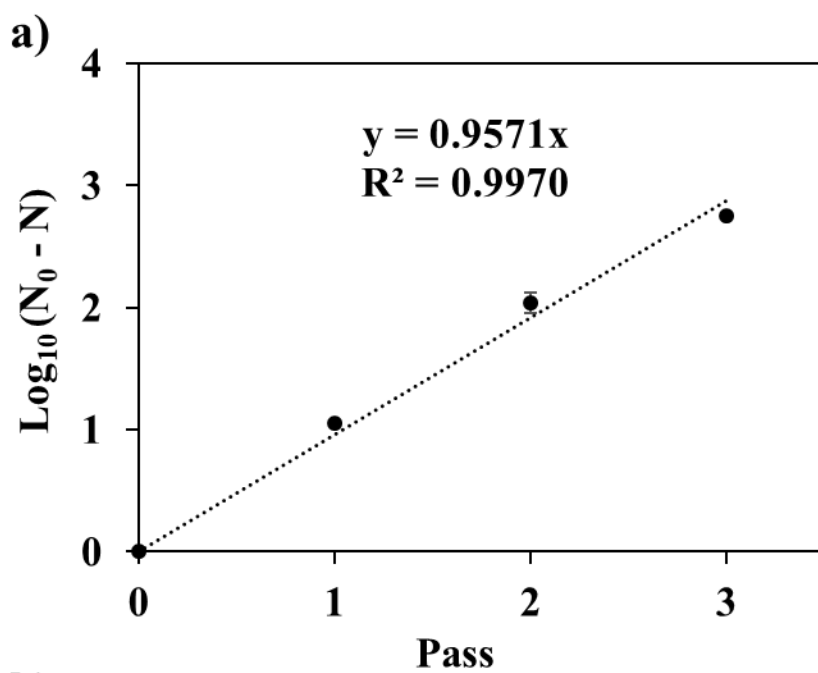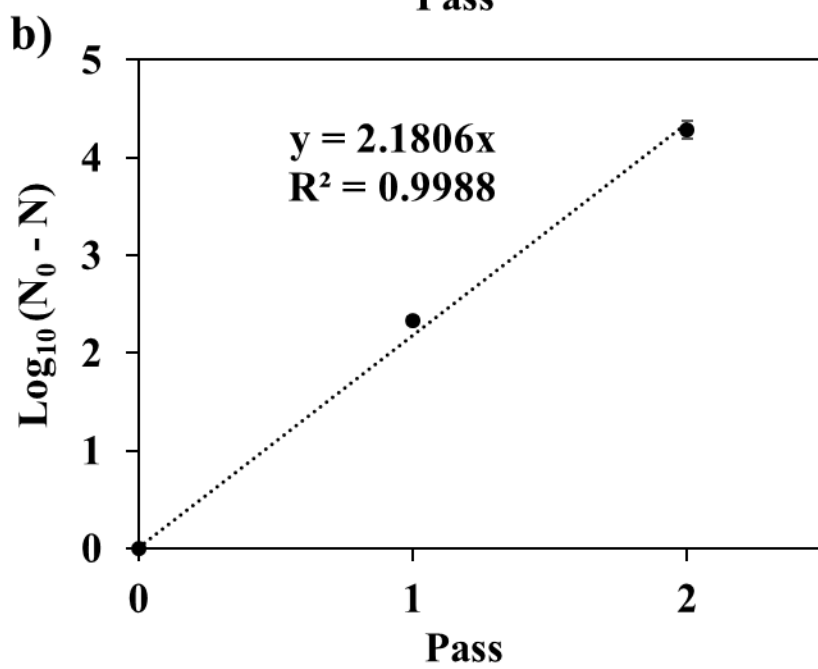

635

636

637

638 **Fig. 4**

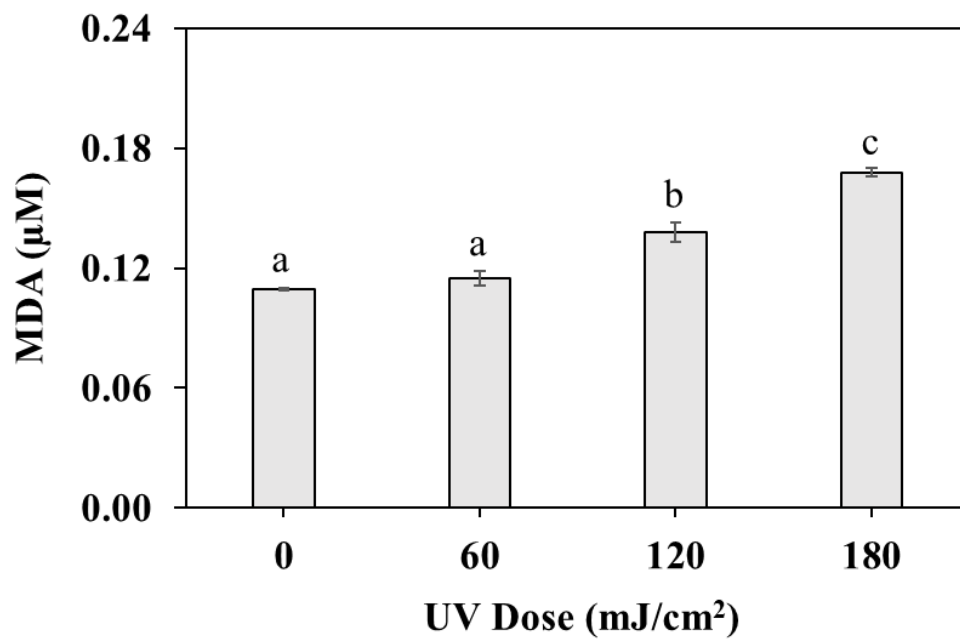

639

### **CRedit authorship contribution statement**

**Pranav Vashisht:** Conceptualization, Methodology, Investigation, Visualization, Writing – original draft. **Brahmaiah Pendyala:** Conceptualization, Methodology, Investigation, Visualization, Writing – original draft, Supervision. **Ankit Patras:** Conceptualization, Methodology, Supervision, Funding acquisition. **Vybhav Vipul Sudhir Gopisetty:** Conceptualization, Methodology. **Ramasamy Ravi:** Methodology, Investigation.
